# Supplementary material for: Optimal thermodynamic conditions to minimize kinetic byproducts in aqueous materials synthesis
Source: Research Square preprint supplement (doi:10.21203/rs.3.rs-2398824/v1), 2023-01-10
Supplement: Supplementary file 1 [file 1bed2d3b1b744936b53c918f.pdf]

Supplementary Information for

Optimal thermodynamic conditions to minimize kinetic byproducts

in aqueous materials synthesis

Zheren Wang<sup>1,2,a</sup>, Yingzhi Sun<sup>1,2,a</sup>, Kevin Cruse<sup>1,2</sup>, Yan Zeng<sup>2</sup>, Yuxing Fei<sup>1,2</sup>, Zexuan Liu<sup>3</sup>,  
Junyi Shangguan<sup>1,2</sup>, Young-Woon Byeon<sup>2</sup>, KyuJung Jun<sup>1,2</sup>, Tanjin He<sup>1,2</sup>, Wenhao Sun<sup>4,\*</sup>,  
and Gerbrand Ceder<sup>1,2,\*</sup>

<sup>1</sup>Department of Materials Science & Engineering, University of California, Berkeley, CA 94720, USA

<sup>2</sup> Materials Sciences Division, Lawrence Berkeley National Laboratory, Berkeley, CA 94720, USA

<sup>3</sup>Industrial Enterprise & Systems Engineering, University of Illinois at Urbana-Champaign, Urbana, IL, 61801, USA

<sup>4</sup> Department of Materials Science and Engineering, University of Michigan, Ann Arbor, MI, USA

\*Corresponding author: whsun@umich.edu and gceder@berkeley.edu

<sup>a</sup>Equal contribution

**This file includes:**

Detailed description of the software code (Synthesis Condition Optimizer) functionality.

# 1 Software: Synthesis Condition Optimizer

As described in the Results and Methods sections, we defined thermodynamic competition as the difference between the free energy of the target phase and the minimum free energy that can be achieved by combining competing phases, and proved thermodynamic competition is convex considering the linearity of a phase’s thermodynamic potential in an aqueous electrochemical system[1, 2]. Thus, we can use gradient-based method to optimize synthesis conditions by minimizing thermodynamic competition. Here, we provide the pseudocode to optimize  $\Delta\Phi(Y)$  to find optimum condition  $Y^*$ , where  $Y$  is an intensive variable such as, pH, in Table 1.

---

**Algorithm:** Gradient Descent Method to minimize  $\Delta\Phi(Y)$  to find thermodynamic optimal condition

---

Choose initial  $Y_0$ , learning rate  $\eta$ , and maximum step number  $T$

For step  $t = 0$  to  $T$ , do

$Y_{t+1} \leftarrow Y_t - \eta g(\Delta\Phi_t)$ , where  $g(\Delta\Phi_t)$  is gradient of the objective function  $\Delta\Phi(Y)$  at  $Y_t$

$\Delta\Phi_{t+1} = \Delta\Phi(Y_{t+1})$

End for

Return  $Y^* = Y_T$ ,  $\Delta\Phi^* = \Delta\Phi_T$ ,

where  $Y^*$  is the predicted optimal synthesis condition and  $\Delta\Phi^*$  is the minimized thermodynamic competition

---

Table 1: The Pseudocode of gradient descent method

All of the codes used for analyzing coordination environment were based on pymatgen software and its Pourbaix diagrams module[3]. We provide code to calculate the thermodynamic competition and optimize synthesis conditions by minimizing thermodynamic competition here: [https://github.com/zherenwang/synthesis\\_condition\\_optimizer](https://github.com/zherenwang/synthesis_condition_optimizer)

## References

- [1] Sun, W., Kitchaev, D. A., Kramer, D. & Ceder, G. Non-equilibrium crystallization pathways of manganese oxides in aqueous solution. *Nature Communications* **10**, 573 (2019).
- [2] Boyd, S. & Vandenberghe, L. *Convex optimization* (Cambridge university press, 2004).

- [3] Persson, K. A., Waldwick, B., Lazic, P. & Ceder, G. Prediction of solid-aqueous equilibria: Scheme to combine first-principles calculations of solids with experimental aqueous states. *Phys. Rev. B* **85**, 235438 (2012).
